# Supplementary material
Source: publisher figshare collection journal article supplement (https://acs.figshare.com/ndownloader/files/5694450)
Supplement: Supplementary file 1 [file 5694450]

*Supplementary Material for*

**Synthesis and Crystal Structure of  $\text{Sr}_2\text{AlH}_7$ : a New Structural Type of Alkaline Earth Aluminum Hydride**

Qing-An Zhang,<sup>†</sup> Yumiko Nakamura,<sup>†</sup> Ken-ich Oikawa,<sup>‡</sup> Takashi Kamiyama,<sup>‡</sup> and Etsuo Akiba<sup>\*,†</sup>

<sup>†</sup> *National Institute of Advanced Industrial Science and Technology, AIST Tsukuba Central 5, 1-1 Higashi, Tsukuba, Ibaraki 305-8565, Japan*

<sup>‡</sup> *High-Energy Accelerator Research Organization (KEK), 1-1 Oho, Tsukuba, Ibaraki 305-080, Japan*

**Structural refinement of  $\text{Sr}_2\text{AlD}_7$**

The Rietveld refinement for the X-ray diffraction data of the deuteride sample was first carried out with a Rietveld refinement program RIETAN-2000. The refined position coordinates and isotropic thermal displacement parameters for  $\text{Sr}_2\text{AlD}_7$  are listed in Table S1. Then the neutron powder diffraction data of the deuteride sample were analyzed by a Rietveld refinement program RIETAN-2001T. During the refinement, the Sr and Al atom coordinates of the deuteride  $\text{Sr}_2\text{AlD}_7$  were fixed as those refined from the X-ray data of the deuteride sample. The deuterium positions were initially located by placing the atoms in the octahedral and tetrahedral holes formed by Sr and Al atoms. The occupation factors of the deuterium positions were fixed at unity because they were close to 1 (the differences were smaller than  $3\sigma$ ) during the refinement. The finally refined position coordinates and isotropic thermal displacement parameters of  $\text{Sr}_2\text{AlD}_7$  are summarized in Table S2.

**Table S1.** Atomic coordinates and isotropic thermal parameters for Sr<sub>2</sub>AlD<sub>7</sub> refined from X-ray diffraction data<sup>a</sup>

| Atom | Site | <i>g</i> | <i>x</i>  | <i>y</i>  | <i>z</i>  | <i>B</i> (Å <sup>2</sup> ) |
|------|------|----------|-----------|-----------|-----------|----------------------------|
| Sr1  | 4c   | 1        | 0.0935(3) | 0.3289(4) | 0.3195(6) | 0.8(1)                     |
| Sr1' | 4c   | 1        | 0.9065(3) | 0.6711(4) | 0.1805(6) | 0.8(1)                     |
| Sr2  | 4c   | 1        | 0.8609(4) | 0.0684(4) | 0.0882(6) | 0.9(1)                     |
| Sr2' | 4c   | 1        | 0.1391(4) | 0.9316(4) | 0.4118(6) | 0.9(1)                     |
| Al1  | 4c   | 1        | 0.671(1)  | 0.847(1)  | 0.232(2)  | 1.2(2)                     |
| Al1' | 4c   | 1        | 0.329(1)  | 0.153(1)  | 0.268(2)  | 1.2(2)                     |

<sup>a</sup>  $R_{wp} = 7.22\%$ ,  $R_p = 5.35\%$ ,  $R_1 = 1.95\%$ ,  $S = 2.83$ . The coordinates and isotropic thermal displacement parameters of atoms *A* and *A'* were constrained by  $x' = 1-x$ ,  $y' = 1-y$ ,  $z' = 0.5-z$  and  $B' = B$ .

**Table S2.** Atomic coordinates and isotropic thermal parameters for Sr<sub>2</sub>AlD<sub>7</sub> finally refined from neutron powder diffraction data<sup>a</sup>

| Atom | Site | <i>g</i> | <i>x</i>  | <i>y</i>  | <i>z</i>  | <i>B</i> (Å <sup>2</sup> ) |
|------|------|----------|-----------|-----------|-----------|----------------------------|
| Sr1  | 4c   | 1        | 0.0935    | 0.3289    | 0.3195    | 0.4(1)                     |
| Sr1' | 4c   | 1        | 0.9065    | 0.6711    | 0.1805    | 0.4(1)                     |
| Sr2  | 4c   | 1        | 0.8609    | 0.0684    | 0.0882    | 0.7(1)                     |
| Sr2' | 4c   | 1        | 0.1391    | 0.9316    | 0.4118    | 0.7(1)                     |
| Al1  | 4c   | 1        | 0.671     | 0.847     | 0.232     | 0.1(2)                     |
| Al1' | 4c   | 1        | 0.329     | 0.153     | 0.268     | 0.1(2)                     |
| D1   | 4c   | 1        | 0.7494(7) | 0.8594(7) | 0.077(1)  | 1.9(2)                     |
| D1'  | 4c   | 1        | 0.2506(7) | 0.1406(7) | 0.423(1)  | 1.9(2)                     |
| D2   | 4c   | 1        | 0.6014(7) | 0.7106(7) | 0.117(1)  | 2.8(3)                     |
| D2'  | 4c   | 1        | 0.3986(7) | 0.2894(7) | 0.383(1)  | 2.8(3)                     |
| D3   | 4c   | 1        | 0.7658(6) | 0.7378(8) | 0.341(1)  | 1.5(2)                     |
| D3'  | 4c   | 1        | 0.2342(6) | 0.2622(8) | 0.159(1)  | 1.5(2)                     |
| D4   | 4c   | 1        | 0.5885(6) | 0.8298(8) | 0.379(1)  | 1.6(2)                     |
| D4'  | 4c   | 1        | 0.4115(6) | 0.1702(8) | 0.121(1)  | 1.6(2)                     |
| D5   | 4c   | 1        | 0.7395(6) | 0.9919(7) | 0.3291(9) | 0.9(2)                     |
| D5'  | 4c   | 1        | 0.2605(6) | 0.0081(7) | 0.1709(9) | 0.9(2)                     |
| D6   | 4c   | 1        | 0.5748(6) | 0.9558(7) | 0.1157(8) | 0.8(2)                     |
| D6'  | 4c   | 1        | 0.4252(6) | 0.0442(7) | 0.3843(8) | 0.8(2)                     |
| D7   | 4c   | 1        | 0.4375(6) | 0.6037(7) | 0.3189(9) | 2.3(2)                     |
| D7'  | 4c   | 1        | 0.5625(6) | 0.3963(7) | 0.1811(9) | 2.3(2)                     |

<sup>a</sup> Space group *I*2 (No. 5-3); cell parameters:  $a = 12.552(1)$  Å,  $b = 9.7826(8)$  Å,  $c = 7.9816(7)$  Å,  $\beta = 100.286(4)^\circ$ ,  $V = 964.3(1)$  Å<sup>3</sup>,  $Z = 8$ ;  $R_{wp} = 2.72\%$ ,  $R_p = 2.15\%$ ,  $R_1 = 5.33\%$ ,  $S = 2.28$ . The coordinates and isotropic thermal displacement parameters of atoms *A* and *A'* were constrained by  $x' = 1-x$ ,  $y' = 1-y$ ,  $z' = 0.5 - z$  and  $B' = B$ . The Sr and Al atom coordinates were fixed as those refined from the X-ray data. The occupation factors were fixed at unity because they were close to 1 (the differences were smaller than  $3\sigma$ ) during the refinement.
